1           **A re-interpretation of the experimental data of Shinder and Taube “Three-dimensional**  
2           **Tuning of Head Direction Cells in Rats”, Journal of Neurophysiology 121(1), 2019.**

3  
4                                   Jean Laurens<sup>1</sup>, Dora E. Angelaki<sup>1,2</sup>

5  
6           <sup>1</sup> *Department of Neuroscience, Baylor college of Medicine, Houston, Texas, USA*

7           <sup>2</sup> *Center for Neural Science and Tandon School of Engineering, New York University, NY, USA*  
8

9  
10       **Abstract**

11       In a recent study, Shinder and Taube (2019) concluded that head direction cells in the anterior  
12       thalamus of rats are tuned to one-dimensional (1D, yaw-only) motion exclusively, in contrast to  
13       recent findings in bats (Finkelstein et al. 2015), mice (Angelaki et al. 2016; Cham et al. 2017;  
14       Laurens et al. 2017), and rats (Page et al. 2017). Here we re-interpret the author’s experimental  
15       results using model comparison and demonstrate that, contrary to their conclusions, their data  
16       actually supports the dual-axis rule (Page et al. 2017) and tilted azimuth model (Laurens and  
17       Angelaki 2018), where head direction cells use gravity to integrate 3D rotation signals about all  
18       cardinal axes of the head. We further show that this study is inconclusive regarding the presence  
19       of vertical orientation tuning; i.e. whether head direction cells encode 3D orientation in the  
20       horizontal and vertical planes conjunctively. Using model simulations, we demonstrate that, even  
21       if 3D tuning existed, the experimental protocol and data analyses used by Shinder and Taube  
22       (2019) would not have revealed it. We conclude that the actual experimental data of Shinder and  
23       Taube (2019) are compatible with the 3D properties of head direction cells discovered by other  
24       groups, yet incorrect conclusions were reached because of incomplete and qualitative analyses.

25       **Introduction**

26       Head direction cells (HDC) track allocentric head orientation, similar to a ‘neuronal compass’.  
27       Since their discovery (Taube et al. 1990a,b), most studies have focused on how HDC encode head  
28       orientation in the horizontal plane (azimuth) when animals explore horizontal surfaces. Initial  
29       studies during 2D motion concluded that HDC treat vertical walls as an extension of the floor (**Fig.**  
30       **1A**) and postulated that the HDC system tracks head orientation by integrating yaw rotations (i.e.  
31       left/right rotations in the egocentric head horizontal plane) exclusively (‘Yaw-only’, YO, model;  
32       **Fig. 1A**; Stackman et al. 2000, Calton and Taube 2005). Furthermore, these studies observed that  
33       HDC lose their tuning when animals walk in an inverted orientation, e.g. on the ceiling in **Fig. 1A**.

34       Recent studies by several other groups, however, have shed additional insight about the 3D  
35       properties of HDC. Experimental (Page et al. 2017) and theoretical (Jeffery et al. 2013; Laurens  
36       and Angelaki 2018) studies have shown that HDC track azimuth by combining egocentric

37 rotations about the head's three cardinal axes, not only yaw, with gravity signals. This process,  
38 which has been called 'dual axis rule' in (Page et al. 2017, **Fig. 1B**) and tilted azimuth (TA) model  
39 in (Laurens and Angelaki 2018), was confirmed experimentally by HDC recordings in the anterior  
40 thalamus of rats (Page et al. 2017). Furthermore, a series of studies have shown that HDC in bats  
41 (Finkelstein et al. 2016), mice (Angelaki et al. 2016; Cham et al. 2017; Laurens et al. 2017) and  
42 likely macaques (Laurens et al. 2016) can also represent head tilt, i.e. head orientation in vertical  
43 planes. By encoding 1D azimuth and 2D tilt conjunctively, the HDC system can thus represent 3D  
44 orientation (**Fig. 1C**).

45 Yet, a recent study of HDC in rats (Shinder and Taube 2019) has challenged the recent evidence  
46 for a 3D organization of the HDC system by resurrecting the YO model. Based on a series of 3D  
47 passive rotation protocols, the authors have re-iterated the conclusions from previous studies,  
48 i.e. that HDC: (1) are updated by yaw rotations only; and (2) don't exhibit any tilt (vertical  
49 orientation) tuning. These conclusions were made without quantitative analyses and model  
50 comparison, and without discussing the contradiction to recent findings from other groups.

51 Why do Shinder and Taube's conclusions differ from recent findings in an array of mammalian  
52 species (Page et al. 2017, Laurens et al. 2016, Angelaki et al. 2016; Cham et al. 2017; Laurens et  
53 al. 2017; Finkelstein et al. 2015)? We have re-examined their data quantitatively using  
54 comparisons with model simulations, and reached entirely different conclusions. Specifically, we  
55 find that (1) the HDC responses of Shinder and Taube (2019) cannot be predicted by the YO  
56 model, in direct conflict with their conclusion, but are in fact supportive of the dual axis/TA  
57 azimuth model. Importantly, the YO and the dual axis/TA models are mutually exclusive. The dual  
58 axis rule, by definition, implies that 3D, not just yaw, rotation signals processed by gravity are  
59 necessary to update and maintain the azimuth tuning of HDC.

60 Regarding their second conclusion, we demonstrate that (2) the experimental protocol and data  
61 analyses used by Shinder and Taube (2019) entangle azimuth and putative tilt tuning in a way  
62 that would conceal the existence of tilt tuning; thus making their study essentially inconclusive  
63 in this regard.

64 Here we present this analysis, first focusing on azimuth coding by providing a quantitative  
65 comparison between predictions of the two azimuth (TA and YO) models (which Shinder and  
66 Taube never did). We next present model simulations demonstrating that, even if tilt tuning  
67 existed, it would not have been obvious using the authors' experimental protocol and data  
68 analyses. We start with a brief description of the two azimuth tuning models.

69 ***Shinder and Taube: HDC are tuned to azimuth only based on a YO model that leads to a***  
70 ***hemitorus/ellipsoidal tuning scheme***

71 According to Shinder and Taube (2019; see also Stackman and Taube, 2000), HDC are tuned to  
72 azimuth only, as follows: (1) azimuth is computed by always integrating exclusively yaw (head-  
73 fixed left-right) rotations (Fig. **1A**, cyan; referred to as the 'YO model'); (2) on sloped surfaces, a

74 HD cell fires as if the surfaces were extensions of the floor; (3) azimuth tuning is lost at tilt angles  
75 larger than  $90^\circ$ .

76 To conceptualize these properties, Shinder and Taube (2019) refer to a “hemitorus” (which,  
77 should be noted, is unrelated to Finkelstein’s (2015) toroidal model) and “ellipsoid”, illustrated  
78 graphically in **Fig. 2**. The hemitorus is produced by plotting the cell’s tuning curve in a polar plot  
79 on the head’s yaw plane (**Fig. 2A**, dark blue: response on the earth-horizontal and earth-vertical  
80 planes) as the head tilts  $\pm 90^\circ$  about an axis perpendicular to the PD (**Fig. 2A**, red). Note that the  
81 hemitorus restricts head tilt to  $90^\circ$ , such as to imply the loss of tuning when the head is inverted  
82 (allowing the head’s horizontal plane to rotate fully ( $\pm 180^\circ$ ) would form a full torus). The  
83 ellipsoidal model follows a similar rationale (**Fig. 2B**), now describing tilts about an axis parallel  
84 to the PD (red line).

85 Note that the hemitorus and ellipsoidal models are not only qualitative in nature, but also  
86 incomplete; they do not consider truly 3D movements: each covers a 2D range of movements  
87 (the hemitorus model deals with movements that can be expressed as pitch followed by yaw  
88 and the ellipsoid model deals with roll + yaw), and together the two models cover only two 2D  
89 subspaces of the ensemble of 3D head rotations, leaving out most 3D orientations. Most  
90 importantly, the YO model of Shinder and Taube (2019) would completely lose allocentric  
91 invariance for any movement that would bring the animal’s head outside these two planes (**Fig.**  
92 **1B; Fig. 2C**; see Laurens and Angelaki 2018 for details).

93 This problem is illustrated by plotting the predicted firing rate of a HDC when the animal walks  
94 on a variety of planes (**Fig. 2C**). In this figure, the hemitorus is used to predict the tuning curves  
95 when the animal transitions between surfaces 1,2 and 4 and the ellipsoid is used to predict the  
96 tuning curves when the animal transitions between surfaces 1,3 and 5. What would happen if the  
97 animal transitioned between other pairs of surfaces? E.g., if the animal transitioned from surface  
98 2 (where the tuning curve peaks when the animal faces ‘upward’) to surface 3, the YO model  
99 would not update; thus, the resulting tuning curve (**Fig. 2C**, broken blue line) would still point  
100 ‘upward’, in contradiction with the prediction of the ellipsoid model (solid line). This is because,  
101 according to Shinder and Taube’s YO model, azimuth would not get updated during this transition  
102 from surface 2 to surface 3. Here lies exactly the problem with the YO model: it cannot handle  
103 3D rotations and is not inherently consistent when movements are not restricted to rotations  
104 about axes parallel and perpendicular to HDC PDs.

### 105 ***Model of HDC during 3D motion: the TA/dual axis rule***

106 In contrast to the YO model, updating TA azimuth must follow the dual axis rule (Page et al. 2017;  
107 **Fig. 3A**), by integrating both yaw (**Fig. 3A**, cyan) and earth-vertical axis (**Fig. 3A**, green) rotations.  
108 One can think of any arbitrary rotation being decomposed into a frame formed by the head-fixed  
109 yaw axis, the earth-vertical axis and the null axis (**Fig. 3A**, red). Both yaw and earth-vertical axis  
110 rotations should update TA (in contrast to the YO model, which is updated only during yaw  
111 rotations); only rotations about the null axis do not update TA. By definition, the null axis is

112 orthogonal to the yaw and earth-vertical axes (which are themselves not necessarily orthogonal)  
113 and therefore lies at the intersection of the head-horizontal and earth-horizontal planes. Thus,  
114 the TA at any 3D head orientation can be computed by placing a compass in the head-horizontal  
115 plane, and orienting it such that it matches the earth-horizontal compass at the level of the null  
116 axis (**Fig. 3A**, red; e.g., both compasses read  $\pm 90^\circ$  along this line). Further details about the TA  
117 and dual axis rule models can be found in (Page et al. 2017, Laurens and Angelaki 2018).

118 Of course, when the head is upright, yaw and earth-vertical axes are identical. When the head is  
119 upside-down, these two axes are opposite. Thus, TA is not defined in this position, accounting  
120 perhaps for the fact that the cell isn't tuned to azimuth when upside-down.

### 121 ***Tilt-dependent azimuth tuning***

122 Next, for both the YO and TA models, we add a property, which for now can be considered an  
123 assumption (but we know from our own experimental data to be true; Laurens et al. 2017): the  
124 magnitude of azimuth tuning is largest in upright orientation and decreases as a function of head  
125 tilt. We illustrate this assumption by representing the firing rate of a model cell as a function of  
126 azimuth (**Fig. 3B**, abscissa) and tilt (**Fig. 3B**, ordinate) as a color map. On average across all tilt  
127 angles (upper marginal distribution), the cell is tuned to azimuth. Note, however, that the  
128 average firing rate as a function of tilt across all azimuths (right marginal distribution) is uniform.  
129 As will be shown later, we define tilt tuning as the average firing rate across all azimuths and  
130 therefore, by such a definition, a cell's azimuth tuning can depend on tilt angle, without the cell  
131 being tuned to tilt.

132 Mathematically, we model azimuth tuning curve when the head is upright by a von Mises  
133 function. For simplicity, we set the cell's preferred azimuth to  $0^\circ$  and its peak firing rate to 1:

$$134 \quad FR_{Az}(Az) = \exp(\kappa \cdot \cos(Az))/k,$$

135 where  $Az$  is the azimuth angle,  $\kappa$  is the von Mises function's parameter and  $k$  is a normalizing  
136 constant set such that  $FR_{Az}(0) = 1$ . The hypothesized tilt-dependent modulation of the tuning  
137 strength can be parametrized as follows ( $\alpha$ : tilt angle):

$$138 \quad FR_{Az}(Az, \alpha) = G(\alpha) \cdot \exp(\kappa \cdot \cos(Az))/k + (1 - G(\alpha)),$$

139 where  $G(\alpha) = k_G \cdot (1 - \sin^2(\alpha/2))$  is a tilt-dependent gain function with parameter  $k_G$  and  $k$  is the  
140 average of  $\exp(\kappa \cdot \cos(Az))$  across all values of  $Az$ , such that the average of  $FR_{Az}(Az, \alpha)$  across all  $Az$   
141 is equal to 1 independently of  $\alpha$ . Note that, in upside-down position ( $\alpha=180^\circ$ ),  $G(\alpha)$  is equal to  
142 zero and the cell's firing rate is set to 1. Thus, even though TA is not defined in upside-down  
143 position, the cell's firing rate can still be computed continuously.

### 144 ***YO vs. TA models***

145 The difference between the dual-axis rule and the YO model is also illustrated **Fig. 2C**. The dual  
146 axis rule predicts that azimuth will be updated by yaw rotations when the animal remains in a  
147 given surface, similar to the YO model. Furthermore, like the YO model, the dual axis rule predicts  
148 that azimuth should not be updated when transitioning between surface 1 and any other surface,

149 since these transitions correspond to the null axis (marked as red in **Fig. 2C**). However, the dual-  
150 axis rule predicts that azimuth should be updated by the second rule when transitioning between  
151 vertical surfaces, e.g. 2 and 3 in **Fig. 2C**, which would allow maintaining consistency between the  
152 tuning curves shown on all surfaces.

153 In their publication, Shinder and Taube (2019) do not acknowledge that the YO and TA model are  
154 inconsistent with each other. In fact, they repetitively suggest that the two are the same, which  
155 is absolutely incorrect. Specifically:

- 156 - The YO and TA models have in common that azimuth is measured on a compass affixed  
157 to the head-horizontal plane. In fact, the two models are equivalent for a restricted range  
158 of 2D movements (i.e. those in **Fig. 2A,B** with less than 90° tilt). However, because the YO  
159 model lacks the second axis rule, it predicts that HD responses will lose consistency during  
160 3D rotations. The TA model can handle any 3D re-orientation, but the YO model fails  
161 saliently.
- 162 - The YO/hemitorus/ellipsoidal model incorporates the added assumption that HD tuning  
163 vanishes abruptly when tilt angle exceeds 90°. The TA model is undefined in upside-down  
164 orientation (i.e. at a tilt angle of 180°) but otherwise doesn't make any assumption about  
165 the range in which HDC encode azimuth. We added a tilt-dependent gain modulation in  
166 the TA model, whereby HDC responses decrease continuously when head tilts.

167 Replacing that azimuth tuning vanishes when animals are inverted with a cutoff at a tilt angle of  
168 90°, with a smooth and continuous dependence, is but a small detail. To be able to directly  
169 compare the other more important predicted differences of the YO versus TA model, we assumed  
170 the same smooth tilt angle dependence for both models. Thus, all simulations shown here differ  
171 only on the fundamental difference between YO and TA models: the 2<sup>nd</sup> dual axis updating rule.

### 172 ***Simulations of TA and YO models: HDC responses support the dual axis/TA model***

173 In order to determine whether Shinder and Taube's data support the dual axis/TA rule or the  
174 yaw-only model, we simulated the responses of model HDC encoding either YO or TA azimuth  
175 using the whole range of manipulations performed in (Shinder and Taube 2019). These  
176 simulations were compared to the average responses reported by the authors.

177 To determine each model's parameter  $\kappa$  and  $k_G$ , we fitted them to the average HD response  
178 reported in all manipulations. We found that the best fitting parameters were similar in both  
179 models:  $\kappa = 4.6$  and  $k_G = 0.46$  for the TA model and  $\kappa = 6.3$  and  $k_G = 0.42$  for the YO model.

### 180 ***HDC integrate 3D rotation signals, and not only yaw***

181 In the first manipulation (**Fig. 4A**), the head is upright and the rotation axis coincides with the  
182 head's yaw axis. Therefore, the trajectories are the same in both YO and TA models ('Trajectory'  
183 panel, TA: blue; Yaw-only: cyan) and the predicted tuning curves ('Tuning Curves' panel) are  
184 similar (although the parameters of both models differ slightly, this difference is negligible in

185 practice). Both predictions are highly correlated (TA:  $\rho=0.99$ ; YO:  $\rho=0.97$ ) with the average  
186 response measured across cells ('Tuning Curves' panel, black).

187 In the next two manipulations, the head is tilted 45° in pitch (**Fig. 4B**) or roll (**Fig. 4C**), such that  
188 the rotation axis now falls between the head's yaw and roll axes (**Fig. 4B**) or yaw and pitch axes  
189 (**Fig. 4C**). According to the TA model, this rotation corresponds to the second updating rule (axis  
190 parallel to gravity), and the brain integrates 3D (yaw, pitch, roll) rotation signals to update  
191 azimuth accurately ('Trajectory' panels, blue). Because the head is tilted, HD tuning is reduced  
192 (**Fig. 3B**), although to a minimal extent since tilt angle is small (45°). Thus, the TA model predicts  
193 that cells exhibit a clear tuning ('Tuning Curves' panels, blue), in agreement with experimental  
194 results ( $\rho=0.98$ ). In contrast, the YO model predicts that azimuth is not tracked accurately since  
195 the rotation is not aligned with the yaw axis. Specifically, yaw velocity is equal to 71% of the total  
196 velocity (i.e. the cosine of 45°) and therefore the YO model predicts that the rotation is  
197 underestimated: after a rotation of 360°, the estimated azimuth is 255° ('Trajectory' and 'Tuning  
198 Curves' panels, cyan), and therefore the simulated firing doesn't return to the peak value which  
199 is expected when facing the PD. This prediction doesn't correlate well ( $\rho=0.6$ ) with the average  
200 tuning curves reported by Shinder and Taube (2019).

201 In the subsequent manipulations (**Fig. 4D,E**), head tilt increases to 90° such that the rotation  
202 occurs in the pitch or roll plane. As in the previous manipulations, the TA model predicts that  
203 these pitch and roll rotations correspond to the 2<sup>nd</sup> updating rule and are thus integrated to  
204 generate a veridical azimuth signal ('Trajectory' panels, blue), although the cell's response tuning  
205 is now significantly attenuated due to the large head tilt ('Tuning Curves' panels, blue). In  
206 contrast, the YO model predicts that HDC do not detect any change in azimuth ('Trajectory'  
207 panels, cyan), and therefore the simulated firing rate is identical at all head positions ('Tuning  
208 Curves' panels, cyan). When averaged across all manipulations, we found that HDC responses  
209 measured by Shinder and Taube exhibited a weak modulation that matched the TA model's  
210 simulation ( $\rho=0.86/0.95$  in **Fig. 4D/E**, respectively). In contrast, Shinder and Taube's YO model  
211 predicts that HDC should not respond at all to these manipulations, in contradiction with their  
212 own results (in this case, the correlation is undefined). Remarkably, although these manipulations  
213 provide strong experimental support for the TA model, the authors reached the opposite  
214 conclusion without any simulations or quantification!

215 In a final manipulation (**Fig. 4F**), the head is placed upside down. In this simulation, both models  
216 predict that the neuron is unmodulated.

#### 217 *HDC responses during yaw rotations in an earth-vertical plane*

218 Next we consider a series of manipulations where the animal rotates in yaw about an earth-  
219 horizontal axis. These manipulations cannot distinguish between the TA and YO models, because  
220 predictions are identical: both models predict that azimuth is updated by the rotation, although  
221 the predicted firing is attenuated since the head is tilted by 90° (**Fig. 5A-C**, 'Trajectory' panels).

222 The predicted tuning curves match equally well the experimental data (TA model:  
223  $\rho=0.84/0.94/0.72$ ; YO model:  $\rho=0.79/0.92/0.67$ ).

#### 224 *HDC responses during pitch and roll rotations in an earth-vertical plane*

225 Shinder and Taube also performed a series of manipulations where animals rotate in pitch or roll  
226 in the earth-vertical plane. According to the TA model, these rotations are about the null axis and  
227 should therefore not affect azimuth. According to the YO model, these rotations are about an  
228 axis orthogonal to the yaw axis and shouldn't affect azimuth either. Thus, these manipulations  
229 don't contribute to distinguishing these models. Yet, they provide additional support to our  
230 modeling framework, and in particular to the tilt-dependent gain function used here (**Fig. 3B**).

231 In **Fig. 6A,B**, the animal faces the cell's PD at the beginning of rotation. Since azimuth doesn't  
232 change during the whole rotation cycle, the animal faces the PD during the entire manipulation  
233 ('Trajectory' panels, blue and cyan curves have a constant value of 0). However, the models  
234 predict that the cell's response is modulated by tilt angle (**Fig. 3B**), resulting in a broad tuning  
235 curve ('Tuning curves' panels, blue and cyan) that matches the average responses reported by  
236 Shinder and Taube (TA model:  $\rho=0.84$  and  $\rho=0.76$  in **Fig. 6A** and **B**; YO model:  $\rho=0.85$  and  $\rho=0.76$ ).

237 In **Fig. 6C-F**, the animal initially faces 90° or 180° away from the cell's PD. As in previous  
238 manipulations, both models predict that the rotation doesn't change azimuth ('Trajectory'  
239 panels, blue and cyan curves). The cell's predicted response corresponds to its firing at 90° or  
240 180° azimuth in **Fig. 3B** and is affected to a small extent by tilt angle. Shinder and Taube (2019)  
241 observed a weak modulation in **Fig. 6C,D**, that wasn't predicted by either the TA or YO model  
242 (but might be attributable to tilt tuning, see next section). In **Fig. 6E,F**, the average firing was  
243 weak, as predicted by both models. In **Fig. 6E**, it correlated with the predicted tuning curve,  
244 although this correlation may not be very meaningful due to the weakness of the predicted  
245 modulation.

#### 246 *Other manipulations*

247 Shinder and Taube (2019) also performed complex rotation protocols illustrated in **Fig. 7**. In **Fig.**  
248 **7A**, the head starts from 45° nose-up tilt and rotates around an earth-horizontal axis. In this  
249 situation, TA follows a non-linear trajectory ('Trajectory' panel, blue) while the YO model predicts  
250 that rotation velocity is underestimated ('Trajectory panel', cyan), similar to **Fig. 4B,C**. The  
251 average measured firing rate measured correlates better with the TA than YO model ( $\rho=0.86$  vs  
252 0.52).

253 The manipulations in **Fig. 7B,C**, are combinations of yaw and roll or yaw and pitch (that can't be  
254 represented using a single rotation axis as in other panels). The TA and YO models predict that  
255 azimuth follows different trajectories ('Trajectory' panels, blue versus cyan). However, in both  
256 trajectories, the head is inverted after 180° of rotation, resulting in a low firing rate, and the head  
257 returns to facing the PD after 360° of rotation, resulting in a high firing rate. Therefore, the  
258 predicted responses are very similar ('Tuning curves' panel, blue versus cyan), despite the  
259 trajectories being different. Both models predict that HDC should be strongly modulated during

260 these simulations, in agreement with simulation results (TA model:  $\rho = 0.99$  and  $0.99$  in **Fig. 7B**  
261 and **C**; YO model:  $\rho = 1.00$  and  $0.99$  in **Fig. 7B** and **C**).

262 ***Conclusions: Shinder and Taube's experimental results support the TA, and not the YO model***

263 One of the two main conclusions of Shinder and Taube (2019) is that azimuth is only updated by  
264 yaw rotations, using incorrect qualitative arguments, rather than model-based analyses. In  
265 contrast, here we have simulated each of the two (TA and YO) models and compared with their  
266 experimental data. Strikingly, this comparison demonstrates that the experimental data is rather  
267 supportive of the TA/dual axis rule model, where HDC encode TA and, thus, by definition,  
268 integrate rotations about all three head axes. We may also point out that, while the attenuation  
269 of HDC tuning is a complicating factor, both the TA and YO models assume its existence. Thus,  
270 this factor doesn't affect the comparison between the two models.

271 The critical manipulations for distinguishing between the YO versus TA models are rotations  
272 about an earth-vertical axis (which represents the 2<sup>nd</sup> axis of the dual axis rule) with the animal  
273 at different static orientations, as shown in **Fig. 4**. Shinder and Taube's YO model predicts that  
274 HDC should not be updated correctly in **Fig. 4B,C**, when the head is tilted by  $45^\circ$  and the rotation  
275 is misaligned with the yaw axis, and that tuning should vanish altogether in **Fig. 4D,E**, when the  
276 head is tilted by  $90^\circ$  and the rotation occurs along the pitch or roll axis. However, their data  
277 indicate that the average HD tuning is maintained in **Fig. 4B,C** as well as in **Fig. 4D,E** although it is  
278 attenuated in the later conditions because the head is tilted. In their study, Shinder and Taube  
279 don't discuss the fact that HDC tuning is maintained when the head is tilted  $45^\circ$  (**Fig. 4B,C**), a fact  
280 that contradicts the model they promote. Furthermore, they conclude from the manipulation in  
281 **Fig. 4D,E**, that HDC aren't updated during rotations in the head's vertical planes, without  
282 appreciating that the response attenuation may be due to head tilt, and not of the fact that the  
283 head rotates in pitch and roll.

284 To explore this matter further, we note that another veridical comparison among TA and YO  
285 model predictions without the possible contamination of tilt attenuation is provided by  
286 considering the manipulations in **Fig. 4D,E** and **Fig. 5**, where head tilt is identical. Based on the  
287 TA model, each of these rotations spans the whole azimuth compass, and, since head tilt is  
288 identical, the attenuation of the cell's response should be identical. In contrast, the YO model  
289 predicts that HD cells should be tuned in **Fig. 5** but not at all in **Fig. 4D,E**. We averaged the  
290 experimental tuning curves in **Fig. 4D,E** and **Fig. 5** and found that the average tuning curves are  
291 similar (**Fig. 8**) and highly correlated ( $\rho = 0.9$ ), thus confirming the TA/dual axis model.

292 Finally, note that the tilt attenuation is directly responsible for the broad tuning curves measured  
293 in **Fig. 6A,B**, which are well fitted by both models. Thus, the existence of tilt attenuation, and our  
294 choice of a continuous gain modulation function to model it, are well supported by experimental  
295 data.

296 Shinder and Taube (2019) performed additional manipulations that resulted in elimination of  
297 directional tuning. For example, in conditions 12, 20, 24, 25, they observed that cells fired  
298 maximally at the beginning of the trajectory, when animals faced the PD, but that this firing didn't  
299 recover after an entire  $360^\circ$  rotation when the animal returned to the PD. The authors



300 emphasized that these occurred during rotations in pitch and roll (manipulations 20, 24 and 25),  
301 and actually used this point to support the YO model. However, they ignored the fact that a  
302 similar phenomenon also occurs in manipulation 12, which is a yaw rotation. Since loss of  
303 directional tuning may occur during rotations about all 3 head axes (yaw, pitch and roll), it doesn't  
304 support any particular model (TA vs. YO). Instead, it likely reflects a decrease in the reproducibility  
305 of neuronal responses when the head tilts away from vertical. The absence of tuning in conditions  
306 6 and 21 may be interpreted in a similar manner.

307 Shinder and Taube (2019) further reported that the average HDC responses may vary between  
308 different manipulations that follow the same trajectory but with different initial positions or  
309 directions (e.g. 12, 13, 14, **Fig. 5A**). However, this occurred only in trajectories where both models  
310 yielded identical predictions. Therefore, the variability of the responses across manipulations  
311 may involve neuronal response variability, alertness or other factors, but doesn't weight in favor  
312 of a particular model.

313 Overall, although HD responses appear to be less consistent when the head tilts, responses that  
314 clearly support the TA frame and dual axis rule were observed at least in one manipulation for  
315 each trajectory. Furthermore, Shinder and Taube (2019) never observed a strong directional  
316 tuning in a direction that was not predicted by the TA model. Therefore, there is absolutely no  
317 evidence in their experimental results in favor of the YO model.

318 Note that, in our model analysis, we reproduced the average tuning curve, across all recorded  
319 cells, by simulating an HD cell that was tuned to azimuth, but not to tilt. This doesn't imply that  
320 individual cells recorded by Shinder and Taube (2019) were not tuned to tilt, but rather than tilt  
321 tuning would generally average itself out when data from multiple cells, that would likely prefer  
322 different tilt, are pooled. We discuss tilt tuning in detail next.

### 323 ***Tilt responses shown in (Shinder and Taube 2019) are biased by azimuth tuning***

324 A second conclusion of Shinder and Taube (2019) is that HDC don't encode head tilt in vertical  
325 planes. This conclusion is based on the analysis of pitch and roll responses recorded when the  
326 head initially faced the PD (Fig. 6 and 7 in their study; i.e. manipulations 4 and 7; **Fig. 6A,B** in the  
327 present manuscript). Specifically, the authors found that neuronal responses were systematically  
328 higher when the animals are upright, compared to responses at tilts larger than 90°, and  
329 concluded that HDC don't exhibit any preference for any tilt position other than upright.

330 Here we show that this observation is biased because the cells' azimuth tuning decreases as a  
331 function of tilt. To illustrate our reasoning, we first define and incorporate tilt tuning in our  
332 model, then simulate HDC responses for conjunctive tilt and azimuth tuning.

### 333 ***Tilt tuning***

334 Recall that we have defined tilt-dependent azimuth tuning curves such that the average value,  
335 across all azimuth angles, is constant (**Fig. 9A**, tilt marginal). Now we define tilt tuning as the cell's  
336 firing rate as a function of tilt angle, averaged across all azimuth angles (**Fig. 9B-D**). Thus, a cell  
337 whose firing rate is sampled uniformly and, when averaged across azimuth, is independent of tilt,  
338 would be classified as azimuth-tuned, but not tilt-tuned. In contrast, tilt tuning should manifest

339 itself as an increase in the cell's firing at a certain tilt angle, regardless of azimuth (**Fig. 9B**). To  
340 analyze Shinder and Taube's results, we only need to simulate tilt tuning during rotations in a  
341 single vertical plane, i.e. pitch or roll. For simplicity, we model tuning curves along a single  
342 rotation axis (e.g. pitch) using a von Mises function:

$$343 \quad FR_{Tilt}(\alpha) = l \cdot (k_{Tilt} \cdot \exp(\lambda \cdot \cos(\alpha - P\alpha)) + (1 - k_{Tilt}))$$

344 where  $\lambda$  is the coefficient of the von Mises distribution,  $k_{Tilt}$  a gain factor,  $\alpha$  is the tilt angle, equal  
345 to 0 or 360° in upright position and 180° when upside-down. The parameter  $l$  is a scaling factor  
346 adjusted so that the curve's peak value is 1.

347 To simulate the response of a cell that encodes both azimuth and tilt conjunctively, we consider  
348 two alternatives where tilt and azimuth interact multiplicatively or additively:

$$349 \quad FR_{Multiplicative}(Az, \alpha) = FR_{Az}(Az, \alpha) / m \cdot FR_{Tilt}(\alpha)$$

$$350 \quad FR_{Additive}(Az, \alpha) = FR_{Az}(Az, \alpha) - m + FR_{Tilt}(\alpha)$$

351 In both equations,  $m$  is equal to the average of  $FR_{Az}(Az, \alpha)$  across all azimuth angles (which is  
352 independent of  $\alpha$ ). It is introduced in both equations to ensure that the average values of  
353  $FR_{Multiplicative}(Az, \alpha)$  and  $FR_{Additive}(Az, \alpha)$  across all azimuths are equal to  $FR_{Tilt}(\alpha)$ , in agreement with  
354 the definition of the tilt tuning curve.

355 Example conjunctive tuning curves, assuming multiplicative or additive interaction, are shown in  
356 **Fig. 9C,D**. In these examples, we have assumed that azimuth and tilt tuning have identical  
357 strength. In this case, the resulting 2D tuning curve adopts a 'cross' shape, with a horizontal band  
358 corresponding to an increased firing at the preferred tilt angle and a vertical band corresponding  
359 to an increased firing at the preferred azimuth.

### 360 ***Bias by azimuth tuning***

361 To illustrate how azimuth tuning may bias tilt tuning identification, we simulate another  
362 conjunctive cell where azimuth tuning (simulated with  $\kappa = 2$  and  $k_G = 1$ ; **Fig. 10A**) is stronger than  
363 tilt tuning (simulated with  $\lambda = 0.5$  and  $k_{Tilt}=1$ ; **Fig. 10B**). We assume that tilt tuning peaks at 135°  
364 (**Fig. 10B**, white line).

365 Under these conditions, azimuth and tilt tuning interact to form a response peak at 0° azimuth  
366 and, importantly, at a smaller tilt angle than 135° (specifically at a tilt angle of  $\alpha=74^\circ$  and  $\alpha=77^\circ$   
367 in **Fig. 10C,D** red/pink circle respectively). This is because the tilt-dependent azimuth tuning (**Fig.**  
368 **10A**), which is maximal at 0° azimuth and near upright, leads to higher firing rates for small tilt  
369 angles. Thus, the fact that azimuth tuning strength is tilt-dependent results in biases of response  
370 peak towards upright, even though tilt PD is at 135°. Note that this 'pulling' of response peak  
371 towards upright is maximal for tilts along the azimuth PD (0° in the present simulations) (**Fig.**  
372 **10C,D**, white lines) – and these are exactly the conditions tested by Shinder and Taube (2019).

373 The extent to which azimuth tuning biases the response to tilt tuning depends on the relative  
374 strength of azimuth vs. tilt tuning (Rayleigh vector length of the corresponding marginals: 0.79  
375 versus 0.25 in **Fig. 10A,B**). We modeled a population of neurons where the tuning strength of tilt

376 and azimuth (measured by their Rayleigh vector length) are independent and distributed  
377 uniformly between 0 and 1, and where the preferred tilt is distributed uniformly between 0 and  
378 360° (**Fig. 10E**, abscissae). We repeated the simulations in **Fig. 10C,D** and computed the tilt angle  
379 at which firing rate would be maximum (**Fig. 10E**, ordinate axis), when facing 0° azimuth, and  
380 assuming a multiplicative (left) or additive (right) interaction. Furthermore, we color-coded  
381 neurons where tilt tuning was stronger than azimuth tuning in green. These neurons appear close  
382 to the diagonal, indicating that pitch tuning was weakly biased in these neurons. In contrast, the  
383 peak response of neurons where azimuth tuning is larger than tilt tuning (blue) appeared away  
384 from the diagonal and close to 0 or 360° on the ordinate axis, indicating that it is strongly biased  
385 towards upright. Note that Shinder and Taube only recorded from cells with strong azimuth  
386 tuning, thus inherently biasing their data in the direction of the blue symbols.

387 To summarize the population responses, we plotted the distribution of preferred pitch  
388 orientation in the absence of azimuth tuning (**Fig. 10F**, white symbols) and the distribution of  
389 peak firing during pitch rotation assuming a multiplicative (red) or additive (pink) model. The later  
390 distributions are biased towards 0°, i.e. upright.

391 Furthermore, additional sources of bias should be considered:

- 392 - First, Shinder and Taube recorded only azimuth-tuned HDC with a Rayleigh vector length  
393 higher than 0.5. Therefore, cells were pre-selected to have a high azimuth response, but  
394 were not selected to have a large tilt response, implying that most cells would have a  
395 stronger azimuth tuning than tilt tuning (i.e., blue symbols in **Fig. 10E**). Since HDC with a  
396 larger azimuth tuning compared to tilt tuning are biased towards responding maximally  
397 in upright, this pre-selection would have biased their results further.
- 398 - We simulated rotations in a single plane (e.g. pitch) and assumed that the tuning strength  
399 of tilt tuning is uniformly distributed, similar to azimuth tuning. However, tilt-tuned cells  
400 may in fact respond preferentially in a different plane, e.g. roll. Because of this, the  
401 distribution of tilt tuning strength should be biased towards lower values and the  
402 population response should be biased even further towards upright.

403 Given these multiple sources of bias, and considering the limited set of cells analyzed (only 11  
404 and 13 cells in manipulations 4 (pitch rotation) and 7 (roll rotations), respectively), it is not  
405 surprising that Shinder and Taube didn't observe any cells firing maximally in the range of 135-  
406 215° tilt, i.e. within  $\pm 45^\circ$  of being upside-down (although some of their cells fired maximally at  
407 90° or 270° tilt, i.e. half-way between upright and upside-down).

#### 408 **Conclusion: Tilt tuning**

409 We conclude that the manipulations shown and analyzed in Shinder and Taube (2019) are  
410 insufficient to characterize the presence or absence of tilt tuning. Our simulations indicate that  
411 they would have observed a clear tilt tuning (characterized by an increase in firing rate at tilt  
412 angles larger than 90°), only in cells where (1) tilt tuning is stronger compared to azimuth tuning,  
413 which would likely represent a minority of the population since recordings were performed in

414 cells where azimuth tuning was strong in the first place, (2) the preferred tilt angle is larger than  
415 90°, and (3) tilt tuning occurs in the plane in which recordings were performed. Considering the  
416 limited sample shown in Shinder and Taube (Figures 6 and 7 in their study: 11 and 13 cells  
417 respectively), it is no surprising that no such cells were found.

418 Tilt responses would be better characterized by measuring pitch and roll responses when the  
419 head faces 90° or 180° away from the preferred azimuth (**Fig. 6C-F** in the present manuscript).  
420 Although this data was collected by Shinder and Taube (2019), it was not used to assess the  
421 presence or absence of tilt tuning and individual cell responses were not shown.

## 422 **Discussion**

423 Shinder and Taube have drawn two conclusions from their dataset:

424 The first conclusion is that the azimuth tuning of HDC follows a ‘yaw-only’ model (**Fig. 1A**), as  
425 stated in their discussion: *“Because the system could not effectively utilize non-horizontal*  
426 *information to determine rotation in the horizontal plane, this result challenges the viability of*  
427 *the internal model, which postulates that the brain uses all available sensory data in combination*  
428 *with gravity information to derive a directional heading vector. [...] Instead, our findings suggest*  
429 *that the horizontal canals and its associated pathways are hard-wired and designed to specifically*  
430 *extract azimuthal heading information – most likely in the form of angular head velocity*  
431 *information.”*. We have shown that this conclusion is not supported by their data. In fact, a  
432 model-based analysis of their experimental protocols and neural responses shows the exact  
433 opposite: HDC responses are inconsistent with the YO model, but instead support the TA/dual  
434 axis model (Page et al. 2017; Laurens and Angelaki 2018), where 3D (yaw, pitch, roll) rotation  
435 information originating from all semicircular canals are integrated with gravity signals to track  
436 azimuthal heading. In particular, we showed that pitch and roll rotations are not expected to  
437 update azimuth based on either the TA or YO model in most manipulations performed by Shinder  
438 and Taube (**Fig. 6**). However, in those manipulations where they should update azimuth  
439 according to the dual axis rule (e.g. **Fig. 4B-E**), they do it just as effectively as yaw rotations (see  
440 **Fig. 8**).

441 The second conclusion is that HDC don’t encode head tilt, as stated in their discussion: *“HD cells*  
442 *increased their firing rates when the animal faced into the recorded cell’s PFD in the horizontal*  
443 *plane, independent of the tilt or roll position of the head, as long as the head did not become*  
444 *inverted by tilt or roll beyond 90°”*. We agree with their conclusion that azimuth signals carried  
445 by HDC decrease with head tilt (although likely not abruptly, as implied by the hemitorus and  
446 ellipsoid but never supported by any data) but we showed that their data is inconclusive  
447 regarding whether HDC are tuned to tilt.

448 The YO model proposed by Shinder and Taube implies that HDC encode exclusively 1D  
449 information. According to the authors, the only effect of 3D motion on HDC is that azimuth tuning  
450 vanishes when animals are inverted. The authors do not describe this as a coding strategy but  
451 merely as an indication that otolith signals play a role in computing head orientation, and clearly

452 state that HDC do not, in their view, encode pitch or roll tilt: “*whereas a sizeable percentage of*  
453 *HD cells in bats (30%) were found to have conjunctive properties with pitch and roll, where the*  
454 *cells were best tuned to a particular orientation in 3D space and not just in the azimuthal plane*  
455 *(Finkelstein et al., 2015, Fig. 4G), there was limited evidence to support this same occurrence in*  
456 *the rat anterodorsal thalamus”*. Therefore, we find it surprising that the authors would state, in  
457 their study’s abstract and title, that “the HD signal is a 3D gravity-referenced signal”, in what  
458 seems in blatant contradiction with their own conclusions.

459 There are other misleading – in fact, erroneous – statements; e.g., “*In this regard [referring to*  
460 *the fact that directional firing is disrupted during inversion], the hemitorus and ellipsoid models*  
461 *when considered fixed to gravity are similar to the dual-axis model (Page et al. 2018), which*  
462 *postulates that the reference frame for HD cells is defined by two parameters: the animal’s head*  
463 *position relative to its dorsal-ventral axis and the relationship of the animal’s dorsal-ventral axis*  
464 *to gravity”*: this implies that the YO and TA models are identical because both somehow (and  
465 loosely) depends on gravity. This is bluntly incorrect; as illustrated here, the two models are  
466 entirely different. This statement also misses the crucial point that the dual-axis model requires  
467 integration of 3D rotation signals, thus contradicting their own conclusion that HD cells integrate  
468 yaw rotations only. The YO and TA/dual axis models are identical only when upright or moving  
469 in 2D (i.e., walking up and down vertical walls, without transitioning between different vertical  
470 walls; **Fig. 1A**). They differ entirely in every other respect: both in their functional significance  
471 (e.g., the YO model loses allocentric invariance during 3D re-orientations) and in the type of  
472 multisensory signals that are necessary to define and update HDC tuning.

473 We have proposed (Laurens and Angelaki 2018) that the HD system combines visual landmark  
474 signals with self-motion information provided by a multisensory 3D internal model (Merfeld et  
475 al. 1999; Laurens and Droulez 2007; Laurens and Angelaki 2011, 2017; Laurens et al. 2013). The  
476 fact that HDC responded as predicted (**Fig. 4-7**) along all three rotation axes supports the 3D  
477 internal model theory. Note that all manipulations in the Shinder and Taube (2019) study were  
478 performed in light, and likely involve a combination of vestibular self-motion signals, visual self-  
479 motion signals, and visual landmarks. Therefore, HDC responses didn’t reflect how the brain  
480 processes vestibular signals specifically, but rather how it maintains a 3D representation of head  
481 orientation based on multisensory signals.

482 In nearly two decades (Stackman et al. 2000, Calton and Taube 2005, Shinder and Taube 2019),  
483 the conclusions of Shinder and Taube’s group, which is that HDC integrate yaw rotations  
484 exclusively to encode 1D azimuth, have remained unchanged. Several groups (Page et al. 2017,  
485 Laurens et al. 2016, Angelaki et al. 2016; Cham et al. 2017; Laurens et al. 2017; Finkelstein et al.  
486 2015) have recently discovered that HDC encode 3D head orientation and derive orientation  
487 signals from 3D rotation signals. Here we have shown that the Shinder and Taube (2019)  
488 experimental results are entirely consistent with the conclusions of these other studies, although  
489 the authors failed to assimilate recent developments to interpret their data in a more model-  
490 driven, quantitative way.

491 **References**

- 492 Angelaki, D.E., Cham, H., Shinder, M., Dickman, D., & Laurens, J. (2016). Gravity tuning in mice  
493 head direction cells. *Soc. Neurosci. Abstract.* 359.17.
- 494 Calton, J. L., & Taube, J. S. (2005). Degradation of head direction cell activity during inverted  
495 locomotion. *Journal of Neuroscience*, 25(9), 2420-2428.
- 496 Cham, H., Laurens, J., Angelaki, D.E., & Dickman, D. (2017). Head direction cells in mice are  
497 referenced to gravity. *Soc. Neurosci. Abstract.* 427.01.
- 498 Finkelstein, A., Derdikman, D., Rubin, A., Foerster, J. N., Las, L., & Ulanovsky, N. (2015). Three-  
499 dimensional head-direction coding in the bat brain. *Nature*, 517(7533), 159-164.
- 500 Jeffery, K. J., Jovalekic, A., Verriotis, M., & Hayman, R. (2013). Navigating in a three-dimensional  
501 world. *Behavioral and Brain Sciences*, 36(5), 523-543.
- 502 Laurens, J., & Droulez, J. (2007). Bayesian processing of vestibular information. *Biological*  
503 *cybernetics*, 96(4), 389-404.
- 504 Laurens, J., & Angelaki, D. E. (2011). The functional significance of velocity storage and its  
505 dependence on gravity. *Experimental brain research*, 210(3-4), 407-422.
- 506 Laurens, J., Meng, H., & Angelaki, D. E. (2013). Neural representation of orientation relative to  
507 gravity in the macaque cerebellum. *Neuron*, 80(6), 1508-1518.
- 508 Laurens, J., & Angelaki, D. E. (2017). A unified internal model theory to resolve the paradox of  
509 active versus passive self-motion sensation. *Elife*, 6, e28074.
- 510 Laurens, J., Cham, H., Dickman, D., & Angelaki, D.E. (2017). Neural encoding of azimuth by head  
511 direction cells during rotation in three dimensions; and interaction with gravity responses. *Soc.*  
512 *Neurosci. Abstract.* 427.02.
- 513 Laurens, J., & Angelaki, D. E. (2018). The brain compass: a perspective on how self-motion  
514 updates the head direction cell attractor. *Neuron*, 97(2), 275-289.
- 515 Merfeld, D. M., Zupan, L., & Peterka, R. J. (1999). Humans use internal models to estimate gravity  
516 and linear acceleration. *Nature*, 398(6728), 615.
- 517 Page, H. J., Wilson, J. J., & Jeffery, K. J. (2017). A dual-axis rotation rule for updating the head  
518 direction cell reference frame during movement in three dimensions. *Journal of neurophysiology*,  
519 119(1), 192-208.
- 520 Shinder, M. E., & Taube, J. S. (2019). Three-dimensional tuning of head direction cells in rats.  
521 *Journal of neurophysiology*, 121(1), 4-37.
- 522 Stackman, R. W., Tullman, M. L., & Taube, J. S. (2000). Maintenance of rat head direction cell  
523 firing during locomotion in the vertical plane. *Journal of Neurophysiology*, 83(1), 393-405.

524 Taube, J. S., Muller, R. U., & Ranck, J. B. (1990). Head-direction cells recorded from the  
525 postsubiculum in freely moving rats. I. Description and quantitative analysis. *Journal of*  
526 *Neuroscience*, *10*(2), 420-435.

527 Taube, J. S., Muller, R. U., & Ranck, J. B. (1990). Head-direction cells recorded from the  
528 postsubiculum in freely moving rats. II. Effects of environmental manipulations. *Journal of*  
529 *Neuroscience*, *10*(2), 436-447.

530

531

532 ***Acknowledgements***

533 This work was supported by Simons Foundation Grant 542949 and Simons Collaboration on the  
534 Global Brain R01-AT010459

535

536

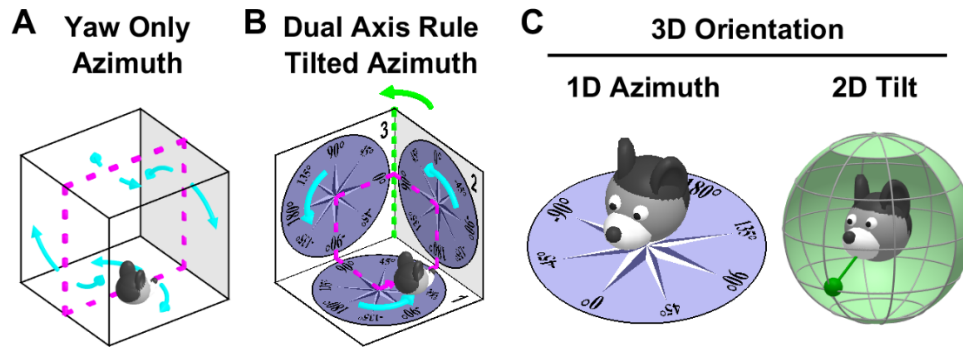

537

538 **Figure 1: Fundamental difference between the Yaw-only (YO) and tilted azimuth (TA) models.**

539 **A:** The Yaw-only (YO) azimuth model (Calton and Taube 2005, Shinder and Taube 2019) assumes  
540 that vertical surfaces are treated as extension of the floor. Azimuth is computed by integrating  
541 yaw (i.e. left/right, cyan) rotations only, irrespective of the allocentric orientation of the  
542 locomotion surfaces. This model is sufficient to track head orientation when walking on the floor,  
543 ceiling and opposite walls of a cage (magenta). **B:** The difference between the YO and tilted  
544 azimuth (TA; Laurens and Angelaki 2018)/dual axis rule (Page et al. 2017) model arises when  
545 movement is not restricted to 2D. In this example, the animal completes a circular trajectory  
546 (magenta) that includes three left-hand yaw turns (cyan). The YO model cannot maintain  
547 allocentric consistency, as it will only register a total azimuth rotation angle of 270°, in  
548 contradiction with the fact that the animal has returned to its initial orientation. The 'missing'  
549 rotation not registered by the YO model occurs when the animal transitions from surface 2 to 3  
550 (green). This is the 2<sup>nd</sup> axis of the dual axis rule: Tracking 3D orientation correctly requires  
551 updating azimuth also when the locomotion surface (or the head horizontal plane) crosses  
552 vertical surfaces, i.e., during rotations about an earth-vertical axis. The equivalent TA model  
553 (Laurens and Angelaki 2018, see **Fig. 3A** for definition) assumes that azimuth is measured in the  
554 compasses drawn on the three surfaces and yields a correct total rotation of 360°. Thus, the YO  
555 model of Shinder and Taube (2019) and the TA/dual axis model of Page et al. (2017) and Laurens  
556 and Angelaki (2018) are consistent with each other only when movement is restricted to 2D (e.g.,  
557 magenta trajectory in A). The YO model would fail to track azimuth during 3D movements (as  
558 shown in B; see also Laurens and Angelaki, 2018). Thus, by supporting the YO model, Shinder and  
559 Taube (2019) imply that the HD system will fail during 3D movements on the surfaces of a cube,  
560 which is inconsistent with experimental results (Page et al. 2017). **C:** Decomposition of 3D  
561 orientation into 1D tilted azimuth and 2D tilt, as proposed by (Laurens et al. 2016, Laurens and  
562 Angelaki 2018). Azimuth measures 1D orientation relative to allocentric horizontal landmarks and  
563 has a circular topology. Tilt measures 2D orientation of the head relative to gravity, or  
564 equivalently the egocentric orientation of the gravity vector (left panel: green pendulum) and has  
565 a spherical topology. This model generalizes Finkelstein's toroidal (Yaw-Pitch) model (Finkelstein  
566 et al. 2015) to 3D.



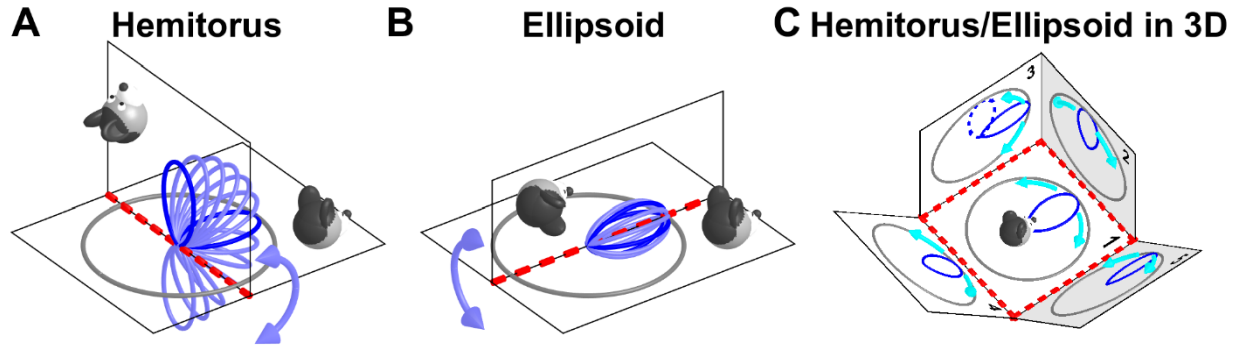

567

568 **Figure 2: Hemitorus and ellipsoid schematics corresponding to the YO model.** **A:** HDC tuning  
569 curves at different head orientations between nose-up and nose-down (light blue) form a  
570 hemitorus when the tilt axis (red) is perpendicular to the cell's PD. Dark blue: tuning curves when  
571 animal oriented as in the drawing. **B:** HDC tuning curves form an ellipsoid when the tilt axis (red)  
572 is now parallel to the cell's PD. The orientations shown in A and B do not cover the full 3D space,  
573 therefore the YO model is incomplete and inadequate to maintain 3D orientation consistently,  
574 as shown in C. **C:** Predicted tuning curves on multiple planes spanning 3D space. The plane  
575 marked '1' is earth-horizontal. The tuning curves shown on earth-vertical planes '2' and '3' are  
576 predicted by the hemitorus and ellipsoid YO model, respectively. The tuning curves on planes '4'  
577 and '5', which are tilted by 45°, are also predicted by same YO model (where azimuth is updated  
578 by yaw rotations only, cyan arrow) during transitions from plane 1. In fact, the YO model allows  
579 tracking azimuth accurately when the head stays in one plane or transitions between plane 1 and  
580 any other plane (a 'null' rotation; see **Fig. 3A**). However, the YO model fails whenever the animal's  
581 movement is such that updating azimuth requires use of the 2<sup>nd</sup> updating rule (rotation about an  
582 earth-vertical axis). The broken line on plane 3 shows the tuning curve that would result from  
583 transitioning from panel 2 to panel 3 based on the YO model. Note that the same physical  
584 orientation on plane 3 would be registered differently by the YO model depending on whether  
585 the animal originated from plane 1 or plane 2. Thus, the YO model would not maintain allocentric  
586 invariance when animals move in 3D.

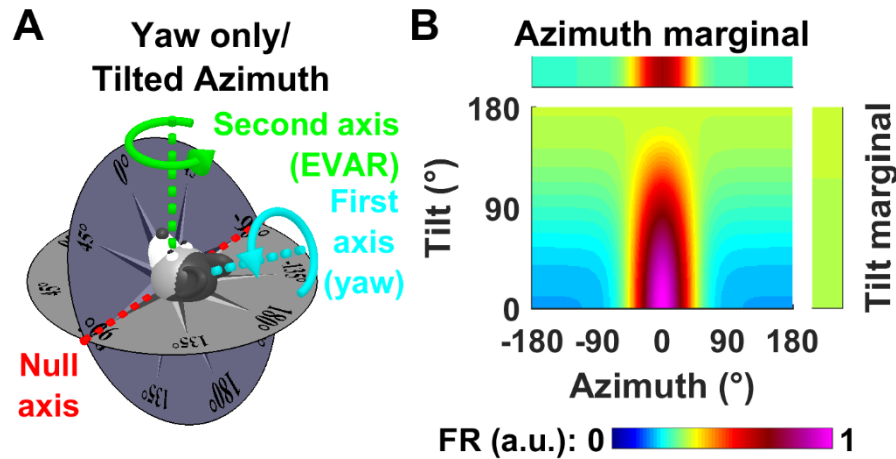

587

588 **Figure 3: Tilted azimuth (TA)/dual axis rule model and dependence of azimuth tuning on tilt**  
589 **angle. A:** Definition of the TA model: Azimuth is measured in a compass affixed to the head-  
590 horizontal plane (dark blue), oriented so that it matches the earth-horizontal compass (grey)  
591 along the null axis (red line). In this model, azimuth is updated both during head-fixed yaw  
592 rotations (cyan arrow) and by rotations around an earth-vertical axis (green). This 2<sup>nd</sup> updating  
593 rule is necessary for the TA compass to maintain allocentric invariance (i.e., consistency with the  
594 earth-horizontal compass). Rotations about the null axis (red) don't affect TA. Note that the TA  
595 and YO models are entirely distinct when considering 3D orientation, because the latter does not  
596 include the dual axis rule and only updates during yaw rotations. **B:** Model tilt-dependent azimuth  
597 tuning curve, with a PD at 0° azimuth (magenta), illustrating tilt-dependent azimuth tuning  
598 strength. The marginal distributions indicate the average firing across all tilt angles (azimuth  
599 marginal) and across all azimuth (tilt marginal; which is uniform). Note that a tilt angle-dependent  
600 azimuth tuning results in an un-tuned tilt marginal (i.e., the model cell is not tuned to tilt).

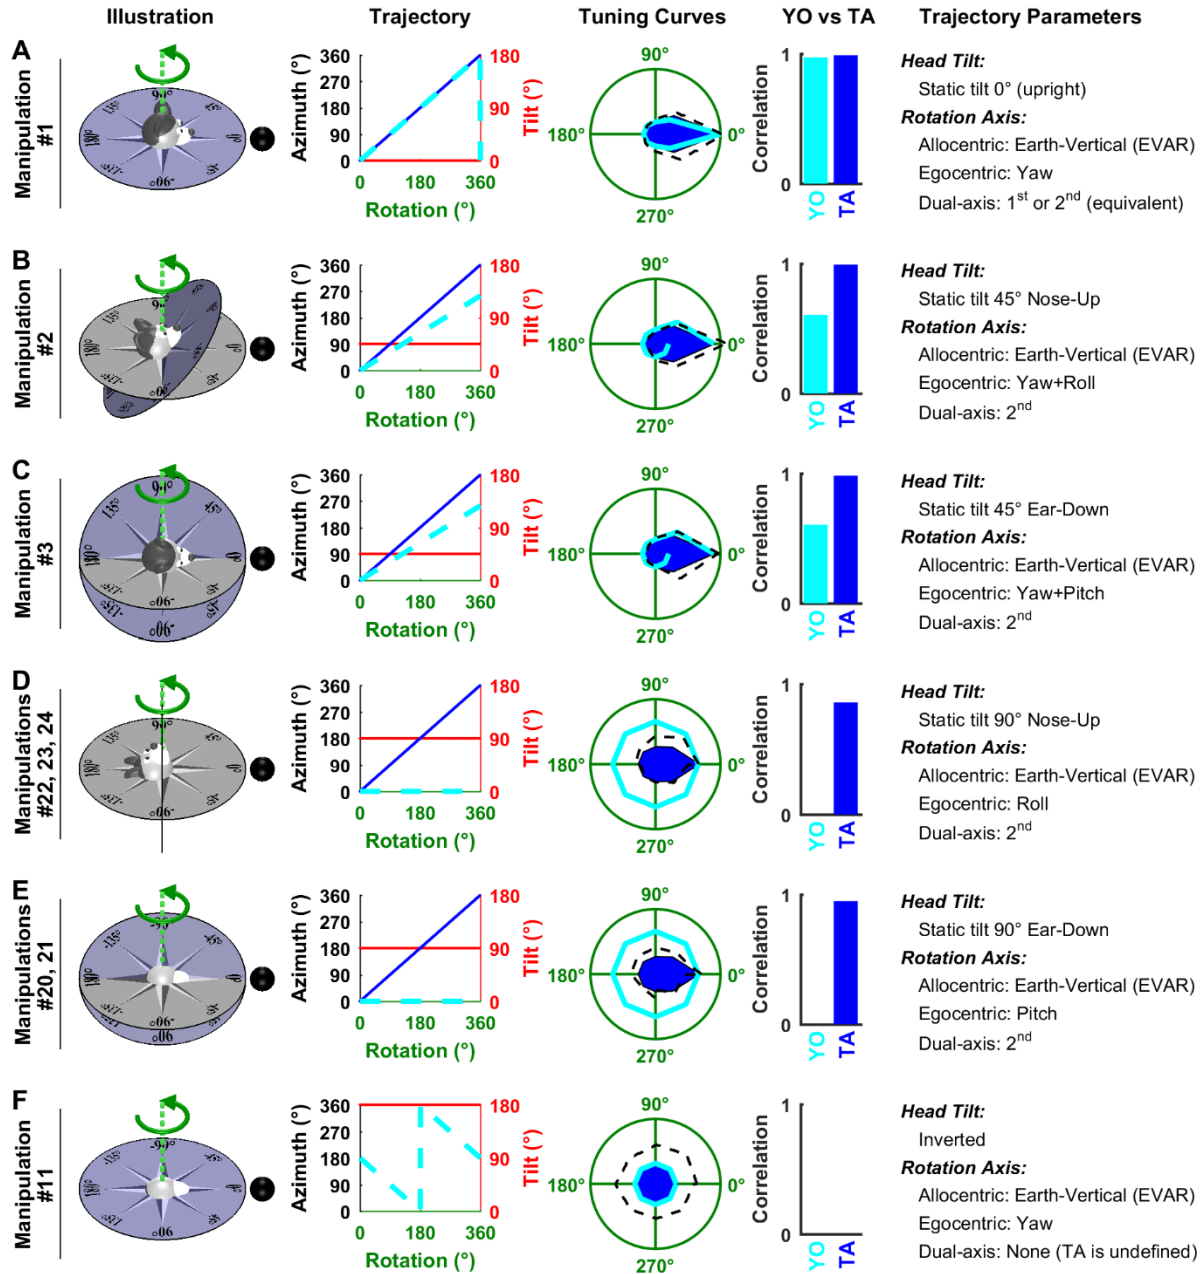

601

602 **Figure 4: Analysis of Shinder and Taube's (2019) manipulations: rotations around an earth-**  
 603 **vertical axis.** Experimental conditions in (Shinder and Taube 2019) are named 'manipulations'  
 604 here, numbered 1 to 27 (see their Fig. 3). Each line corresponds to one manipulation, or to  
 605 multiple manipulations that follow the same trajectory (with different starting positions).  
 606 **'Illustration':** representation of the motion trajectories with the head at 0°. The grey and blue  
 607 azimuth frames represent an earth-fixed and TA compass, respectively. Green: rotation axis.  
 608 Black sphere: cell's PD when the animal is upright. **'Trajectory':** head azimuth (in TA and YO  
 609 frames: blue and cyan, respectively) and tilt (red) resulting from a rotation of  $\pm 180^\circ$  relative to  
 610 the 0° position. **'Tuning Curves':** simulations of each model are compared with experimental  
 611 results. Firing rate is represented in polar coordinate for consistency with (Shinder and Taube  
 612 2019) and normalized to 1 (green circle) when facing the PD in upright orientation. Blue:

613 simulated firing of a cell encoding TA azimuth; Cyan: simulated firing rate of a cell encoding YO  
614 azimuth; Black: experimental results of Shinder and Taube (2019). When the trajectory  
615 corresponds to multiple manipulations, the corresponding results are averaged. **'YO vs TA':**  
616 correlation between the tuning curves predicted by the YO and TA models and the average HDC  
617 response. **'Trajectory parameters':** description of the trajectory, including head tilt, the position  
618 of the rotation axis in allocentric and egocentric coordinates, and decomposition of the rotation  
619 axis based on the dual-axis rule.

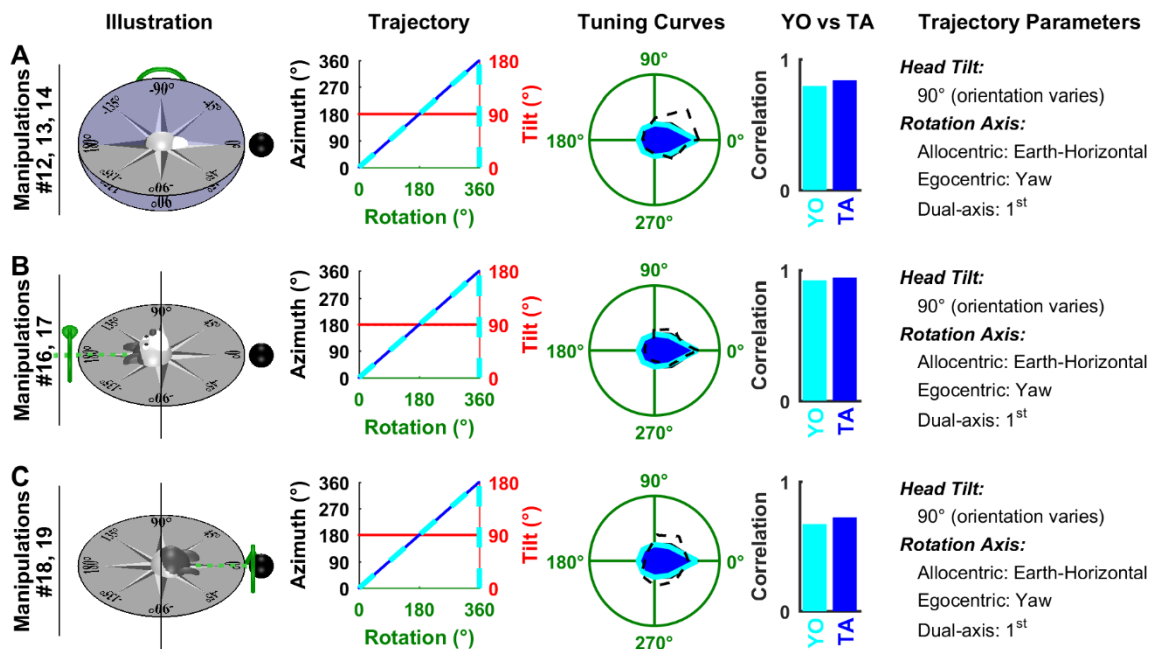

620

621 **Figure 5: Analysis of Shinder and Taube's (2019) manipulations: yaw rotations in the earth-**  
 622 **vertical plane. A: the top of the head faces away from the reader. B,C: the top of the head faces**  
 623 **left/right. In all panels, the head rotates in yaw. Same format as in Fig. 4.**

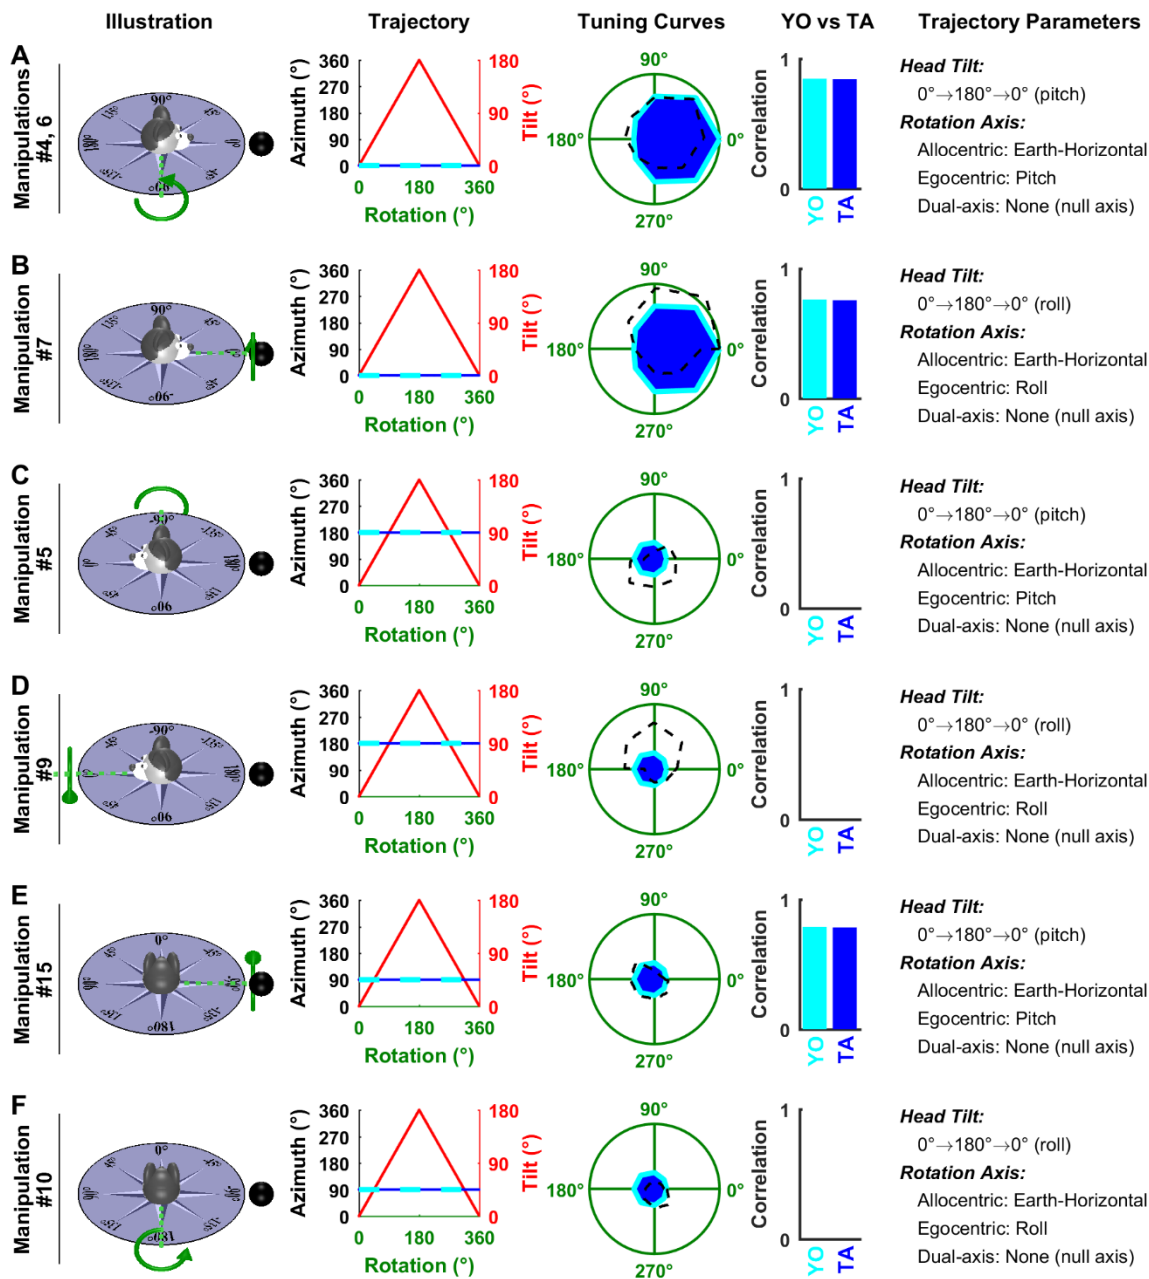

624

625 **Figure 6: Analysis of Shinder and Taube's (2019) manipulations: pitch/roll rotations in the**  
 626 **earth-vertical plane.** Same format as in Fig. 4. Note that, strictly speaking, TA ('Trajectory' panels,  
 627 blue) is not defined when the tilt angle (red) is 180°. However, it is defined in the immediate  
 628 vicinity of this point, such that the blue curve appears uninterrupted.

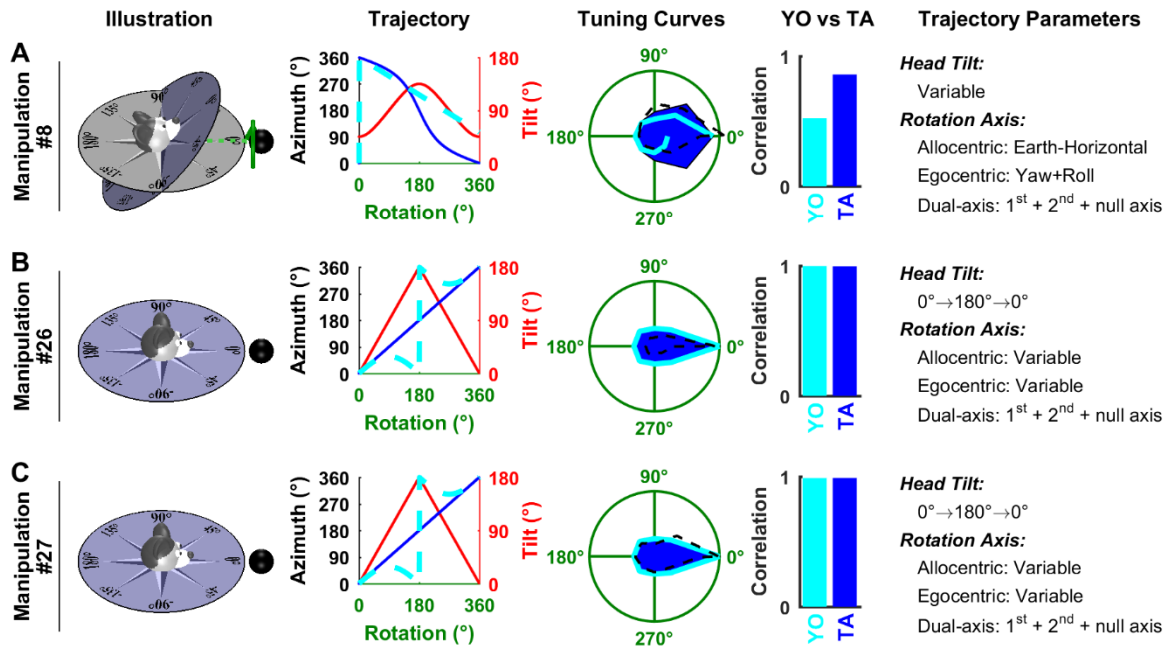

629

630 **Figure 7: Analysis of Shinder and Taube's (2019) manipulations: complex rotations.** Same  
 631 format as in Fig. 4. As in Fig. 6, TA is not defined at 180° tilt in panels B,C; but the corresponding  
 632 curve ('Trajectory' panels, blue) appears uninterrupted since TA is defined in the vicinity of this  
 633 point.

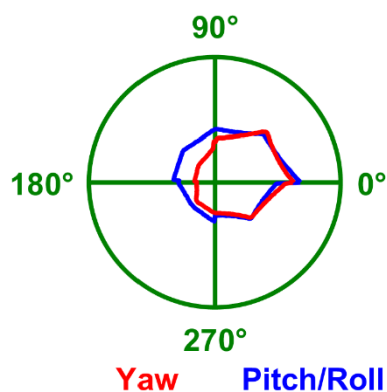

634

635 **Figure 8: Average azimuth tuning curves measured by (Shinder and Taube 2019) with the head**  
636 **tilted 90°.** Red: Tuning curve during yaw rotations in the earth-vertical plane (average of all  
637 manipulations in **Fig. 5**). This tuning is based on the 1<sup>st</sup> axis rule. Blue: Tuning curve during pitch  
638 and roll rotations in the earth-horizontal plane (average of all manipulations in **Fig. 4D,E**). This  
639 tuning is based on the 2<sup>nd</sup> axis rule. As predicted by the TA/dual axis model, the two curves are  
640 highly correlated ( $\rho=0.9$ ). In contrast, the YO model would predict no tuning during pitch/roll  
641 (blue).



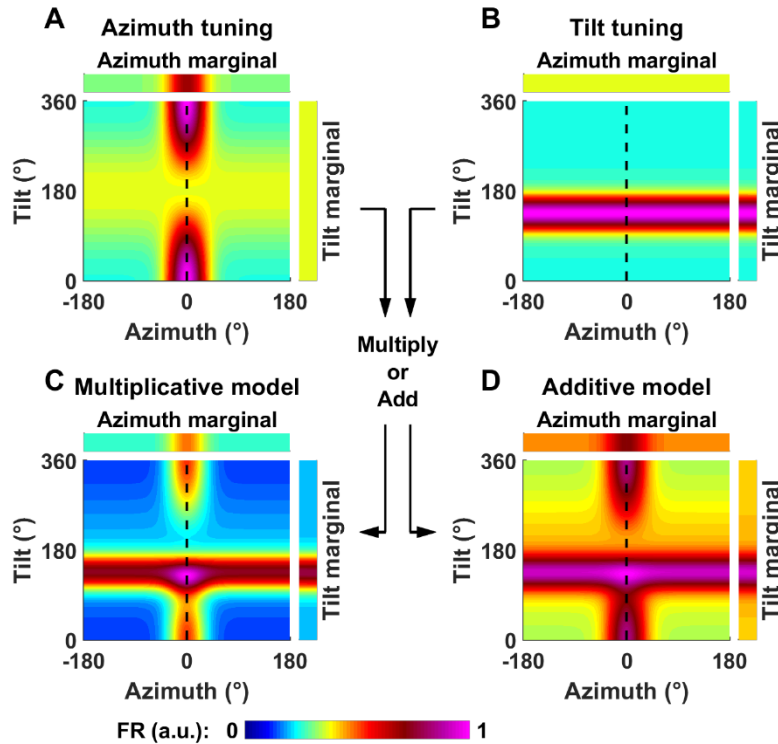

642

643 **Figure 9: Definition of tilt tuning and generalization to conjunctive azimuth and tilt tuning. A:**  
644 **Model cell tuned to azimuth only.** Tilt-dependent azimuth tuning curve of a model cell tuned to  
645 azimuth only (as in Fig. 3A, with the tilt axis ranging from 0° to 360°). **B: Model cell tuned to tilt**  
646 **only.** Tilt tuning is independent of azimuth and peaks at 135°. **C-D: Model cell tuned**  
647 **conjunctively to both azimuth and tilt.** Conjunctive tuning curve, assuming that tilt and azimuth  
648 tuning interact either multiplicatively (C) or additively (D). These simulations assume tilt and  
649 azimuth tuning of equal strength. That is, simulation parameters of tilt tuning curve ( $\lambda = 4.6$ ,  $k_{\text{Tilt}}$   
650  $= 0.46$ ) are identical to the parameters  $\kappa$  and  $k_G$  of the azimuth tuning curve. Note that, for  
651 simplicity, we express tilt along one axis only here (e.g. pitch or roll) and assume that the cell  
652 responds preferentially at a certain tilt angle (135°) along this axis.

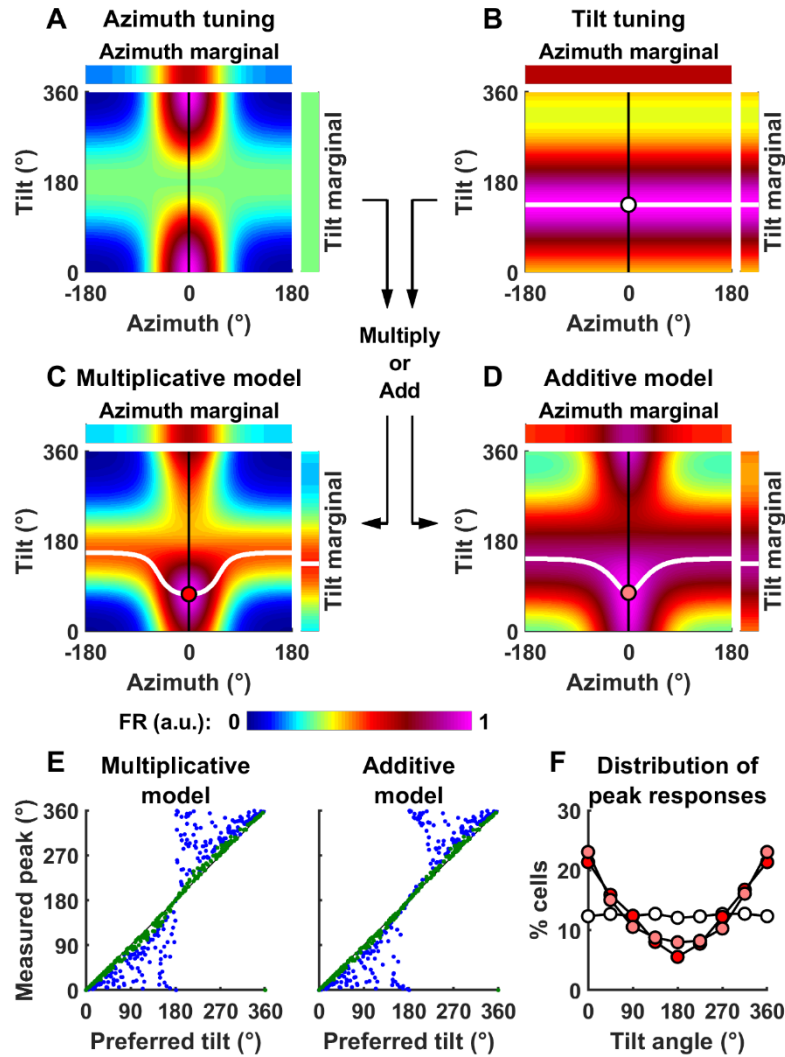

653

654 **Figure 10: Why the pitch/roll rotations when facing the cell's PD (used by Shinder and Taube)**  
 655 **are inappropriate to test for tilt tuning.** A-D: Simulation of a model conjunctive cell, as in Fig. 9,  
 656 but with different parameters such that azimuth tuning ( $\kappa = 2$  and  $k_G = 1$ ) is now stronger than  
 657 tilt tuning ( $\lambda = 0.5$  and  $k_{Tilt} = 1$ ). The solid white lines in B-D indicate the tilt angle at which firing  
 658 peaks, as a function of azimuth. The tilt tuning function in B, where tilt tuning is independent of  
 659 azimuth and peaks at  $135^\circ$ , is multiplied by, or added to the azimuth tuning function (A) to  
 660 produce the tuning curves in C and D. The white (B), red (C) or pink (D) markers indicate the tilt  
 661 angle at which firing peaks when facing  $0^\circ$  azimuth, i.e. the cell's PD: note the bias towards  
 662 upright. E: Peak response measured during pitch or roll, as a function of the cell's preferred tilt  
 663 angle, in 500 simulated cells ( $k_G$  and  $k_{Tilt}$  are set to 1,  $\kappa$  and  $\lambda$  are drawn randomly such that the  
 664 Rayleigh vector length of azimuth and tilt tuning curves are distributed uniformly). Green/blue  
 665 dots: cells where tilt tuning is higher/lower than azimuth tuning. F: Distribution of the preferred  
 666 tilt angle (white markers) and of the angle at which the peak response occurs (red/pink:  
 667 multiplicative/additive model).
